# Supplementary material for: Host-Specificity and Dynamics in Bacterial Communities Associated with Bloom-Forming Freshwater Phytoplankton
Source: PubMed Central journal article supplement (PMC3896425; doi:10.1371/journal.pone.0085950), 2014-01-20
Supplement: pone.0085950.s003.pdf [file pone.0085950.s003.pdf]

**Table S1.** Barcode sequences for each sample

| Sample name | Barcode | Sample name | Barcode | Sample name | Barcode |
|-------------|---------|-------------|---------|-------------|---------|
| Bac_In      | TACTCTC | C_d02_ab2   | TAGCACT | M_d02_ab1   | TACGCTA |
| A_d02_ab1   | TACTCGA | C_d02_ab3   | TAGCAGA | M_d02_ab2   | TAGTCAC |
| A_d02_ab2   | TACTGAC | C_d02_fb1   | TAGCGTA | M_d02_ab3   | TAGACTC |
| A_d02_ab3   | TACTGCA | C_d02_fb2   | TCTACTC | M_d02_fb1   | TAGACGA |
| A_d02_fb1   | TACGTCA | C_d02_fb3   | TCTCTCA | M_d02_fb2   | TAGAGAC |
| A_d02_fb2   | TACGAGT | C_d15_ab1   | TCACAGT | M_d02_fb3   | TAGAGCA |
| A_d09_ab1   | TCTCATC | C_d15_ab2   | TCACGTA | M_d15_ab1   | TCATCGA |
| A_d09_ab2   | TCTCACT | C_d15_ab3   | TCACGAT | M_d15_ab2   | TCATGAC |
| A_d09_ab3   | TCTCAGA | C_d15_fb1   | TCAGTCA | M_d15_ab3   | TCATGCA |
| A_d09_fb1   | TCTGAGT | C_d15_fb2   | TCAGATC | M_d15_fb1   | TCACTAC |
| A_d09_fb2   | TCATAGC | C_d15_fb3   | TCAGAGA | M_d15_fb2   | TCACTCT |
| A_d09_fb3   | TCATCTC | C_d17_ab1   | TGTCACA | M_d15_fb3   | TCACTGA |
| A_d16_ab1   | TCGTAGA | C_d17_ab2   | TGTGTA  | M_d20_ab1   | TGAGTAC |
| A_d16_ab2   | TCGTGTA | C_d17_ab3   | TGTGTCA | M_d20_ab2   | TGAGTCT |
| A_d16_ab3   | TCGATCA | C_d17_fb1   | TGTGCTA | M_d20_ab3   | TGAGTGA |
| A_d16_Ct    | TCAGCTA | C_d17_fb2   | TGATCAC | M_d20_fb1   | TGAGCAT |
| A_d16_fb1   | TCGACTA | C_d17_fb3   | TGACTCA | M_d20_fb2   | TGCTAGA |
| A_d16_fb2   | TCGCATA | C_d02_Ct    | TAGCTCA | M_d20_fb3   | TGCTGTA |
| A_d16_fb3   | TGTACGA | C_d15_Ct    | TCACACA | M_d20_Ct    | TGACACT |
|             |         | C_d17_Ct    | TGTAGCA |             |         |

Barcode sequences used for each sample. Bac\_In, bacterial inoculum. Names of samples are comprised by the first letter of the alga name (A, *Aulacoseira granulata*; C, *Cylindrospermopsis raciborskii*, M, *Microcystis aeruginosa*), day of sampling (dxx), fraction (ab, adhered bacteria; fb, free-living bacteria) and replicate number.
