# Supplementary material for: Host-Specificity and Dynamics in Bacterial Communities Associated with Bloom-Forming Freshwater Phytoplankton
Source: PubMed Central journal article supplement (PMC3896425; doi:10.1371/journal.pone.0085950), 2014-01-20
Supplement: pone.0085950.s004.pdf [file pone.0085950.s004.pdf]

**Table S2.** Concentration of dissolved nutrients in control and treatment cultures.

|                       | day | Control  |           | Treatment |           |
|-----------------------|-----|----------|-----------|-----------|-----------|
|                       |     | Nitrate  | Phosphate | Nitrate   | Phosphate |
| <i>A. granulata</i>   | 2   | 61.8±0.8 | 2.9±0.0   | 64.0±1.2  | 3.1±0.1   |
|                       | 9   | 67.5±0.6 | 3.2±0.0   | 63.1±5.8  | 2.9±0.3   |
|                       | 16  | 64.2±0.5 | 2.8±0.1   | 63±1.6    | 2.6±0.2   |
| <i>M. aeruginosa</i>  | 2   | 64.1±0.1 | 3.2±0.0   | 66.3±0.2  | 3.3±0.1   |
|                       | 15  | 0.1±0.2  | 0.0       | 0.1±0.1   | 0.0       |
|                       | 20  | 0.1±0.1  | 0.0       | 0.0       | 0.0       |
| <i>C. raciborskii</i> | 2   | 66.0±0.4 | 3.0±0.1   | 66.1±0.7  | 3.0±0.1   |
|                       | 15  | 55.5±2.3 | 2.5±0.1   | 32.5±1.6  | 1.4±0.1   |
|                       | 17  | 61.9±1.0 | 2.7±0.2   | 40.2±3.6  | 1.7±0.1   |

Concentration of dissolved nutrients (mg.L<sup>-1</sup>) in control and treatment cultures of the three host species (mean±SD).
