# Supplementary material for: Host-Specificity and Dynamics in Bacterial Communities Associated with Bloom-Forming Freshwater Phytoplankton
Source: PubMed Central journal article supplement (PMC3896425; doi:10.1371/journal.pone.0085950), 2014-01-20
Supplement: pone.0085950.s005.pdf [file pone.0085950.s005.pdf]

Table S3 – Contaminant OTUs in control cultures of *Aulacoseira granulata* and *Microcystis aeruginosa*.

| #OTU                                 | <i>A. granulata</i> | <i>M. aeruginosa</i> | Classification                                                                           |
|--------------------------------------|---------------------|----------------------|------------------------------------------------------------------------------------------|
| 1429                                 | 2                   | 0                    | Bacteria;Actinobacteria;Actinobacteria;Ilumatobacter (acIV-C)                            |
| 3665                                 | 1                   | 1                    | Bacteria;Actinobacteria;Actinobacteria;Actinomycetales;Corynebacterium (acTH2;Myco)      |
| 2692                                 | 2                   | -                    | Bacteria;Bacteroidetes;Sphingobacteria;Sphingobacteriales;Arcicella (bacIII-A)           |
| 1415                                 | -                   | 1                    | Bacteria;Firmicutes;Clostridia;Clostridiales;Veillonellaceae (unclassified)              |
| 4051                                 | 1                   | -                    | Bacteria;Proteobacteria;Alphaproteobacteria;Rhizobiales (alfI)                           |
| 4044                                 | 1                   | -                    | Bacteria;Proteobacteria;Alphaproteobacteria;Rhodobacterales;Rhodobacter (alfVI)          |
| 3179                                 | 1                   | -                    | Bacteria;Proteobacteria;Alphaproteobacteria;Rhodobacterales;Rhodobacter (alfVI)          |
| 4928                                 | 1                   | -                    | Bacteria;Proteobacteria;Alphaproteobacteria;Rhodobacterales;Rhodobacter (alfVI)          |
| 1136                                 | 4                   | -                    | Bacteria;Proteobacteria;Alphaproteobacteria;Sphingomonadales;Novosphingobium (Novo)      |
| 1506                                 | -                   | 1                    | Bacteria;Proteobacteria;Betaproteobacteria;Rhodoferax (betI)                             |
| 4595                                 | 1                   | -                    | Bacteria;Proteobacteria;Betaproteobacteria;Burkholderiales;Limnobacter (Burkholderiales) |
| 4954                                 | 5                   | -                    | Bacteria;Proteobacteria;Betaproteobacteria;Rhodocyclales;Dechloromonas (Burkholderiales) |
| 1598                                 | 1                   | -                    | Bacteria;Proteobacteria;Gammaproteobacteria (LiUU-3-334)                                 |
| 110                                  | 1                   | -                    | Bacteria;Proteobacteria;Betaproteobacteria;Rhodocyclales;Dechloromonas (Burkholderiales) |
| 854                                  | 2                   | -                    | Bacteria;Verrucomicrobia;Opitutae;Opitutaes;Opitutus (Opitutaceae)                       |
| Total (contamination)                | 23                  | 3                    |                                                                                          |
| Chloroplast/<br>cyanobacterial reads | 10861               | 6944                 |                                                                                          |

Number of reads of contaminant OTUs in control cultures of *Aulacoseira granulata* (16<sup>th</sup> culturing day) and *Microcystis aeruginosa* (20<sup>th</sup> culturing day).
