# Supplementary material for: Host-Specificity and Dynamics in Bacterial Communities Associated with Bloom-Forming Freshwater Phytoplankton
Source: PubMed Central journal article supplement (PMC3896425; doi:10.1371/journal.pone.0085950), 2014-01-20
Supplement: pone.0085950.s006.pdf [file pone.0085950.s006.pdf]

Table S4 - Specific OTUs associated with each studied phytoplankton species.

*Aulacoseira granulata*

| # OTU | RDP/FW                                            | # OTU | RDP/FW                                               |
|-------|---------------------------------------------------|-------|------------------------------------------------------|
| 1033  | Betaproteobacteria;Undibacterium/Janb             | 359   | Alphaproteobacteria;/alfI-A1                         |
| 1132  | Betaproteobacteria;Rhodocyclaceae/Burkholderiales | 3687  | Betaproteobacteria;/betVI                            |
| 1310  | Verrucomicrobia;Subdivision3/Verrucomicrobia      | 380   | Alphaproteobacteria;/M-L-85                          |
| 1330  | Betaproteobacteria;Inhella/Burkholderiales        | 3826  | Betaproteobacteria;Rhodocyclaceae/PnecD              |
| 1464  | Alphaproteobacteria;Rhodobacter/alfVI             | 3830  | Betaproteobacteria;Methylophilus/LD28                |
| 1504  | Verrucomicrobia;Subdivision3/Verrucomicrobia      | 3969  | Actinobacteria;Actinomycetales/Actinomycetales       |
| 1889  | Alphaproteobacteria;Blastomonas/alfIV             | 3975  | Bacteroidetes;/bacVI                                 |
| 1914  | Alphaproteobacteria;Rhodobacteraceae/alfVI        | 3998  | Bacteroidetes;Flavobacteriales/bacVI                 |
| 1988  | Betaproteobacteria;Comamonadaceae/Lhab-A4         | 4053  | Betaproteobacteria;Comamonadaceae/betI-A             |
| 235   | Gammaproteobacteria;Gammaprot.;Methylococcaceae   | 4078  | Alphaproteobacteria;Sphingomonadales/Novo-A2         |
| 2371  | Bacteroidetes;Sphingobacteriales/bacVI            | 4087  | Bacteroidetes;Sphingobacteriales/bacI                |
| 2410  | Alphaproteobacteria;Rhodobacter/alfVI             | 4473  | Bacteroidetes;Cytophagaceae/bacIII-A                 |
| 2422  | Betaproteobacteria;Comamonadaceae/Lhab-A4         | 4548  | Alphaproteobacteria;Rhodobacteraceae/alfVI           |
| 2495  | Betaproteobacteria;Pelomonas/Burkholderiales      | 4624  | Gammaproteobacteria;Rheinheimera/Sphingomonadaceae   |
| 2560  | Betaproteobacteria;Comamonadaceae/Lhab-A4         | 4698  | Bacteroidetes;/bacVI                                 |
| 2610  | Betaproteobacteria;Pseudacidovorax/betI-A         | 4868  | Gammaproteobacteria;/Gammaprot;Methylococcaceae      |
| 2666  | Alphaproteobacteria;Caulobacter/alfVI             | 4994  | Alphaproteobacteria;Sphingomonadaceae/M-L-85         |
| 2881  | Bacteroidetes;Chitinophagaceae/bacI-B1            | 5171  | Betaproteobacteria;Ideonella/Lhab-A4                 |
| 2909  | Verrucomicrobia;Spartobacteria/Xip-B1             | 5199  | Gammaproteobacteria;Rheinheimera/Gammaproteobacteria |
| 2976  | Verrucomicrobia;Subdivision3/Verrucomicrobia      | 666   | Bacteroidetes;Sphingobacteriales/Sphingobacteriales  |
| 3037  | Alphaproteobacteria;Blastomonas/alfIV-B           | 677   | Bacteroidetes;Cytophagaceae/bacIII-A                 |
| 3056  | Bacteroidetes;Cytophagaceae/bacIII-A1             | 694   | Alphaproteobacteria;Rhizobiales/alfI-A1              |
| 3100  | Betaproteobacteria;Vogesella/Burkholderiales      | 765   | Betaproteobacteria;Herbaspirillum/betVII-B1          |
| 3228  | Betaproteobacteria;Vogesella/Burkholderiales      | 822   | Verrucomicrobia;Opitutus/Opitutaceae                 |
| 3357  | Alphaproteobacteria;/Pyxis                        | 966   | Betaproteobacteria;Comamonadaceae/alfIV              |
| 3576  | Bacteroidetes;Chitinophagaceae/bacI-A2            |       |                                                      |

*Microcystis aeruginosa*

| # OTU | RDP/FW                                                | # OTU | RDP/FW                                            |
|-------|-------------------------------------------------------|-------|---------------------------------------------------|
| 1227  | Alphaproteobacteria;Acetobacteraceae/alfVIII          | 4419  | Gammaproteobacteria;Silanimonas/Proteobacteria    |
| 1550  | Bacteroidetes;Cloacibacterium/bacVI                   | 450   | Bacteroidetes;Sphingobacteriales/bacI             |
| 1629  | Alphaproteobacteria;/alfIV-A                          | 4507  | Proteobacteria;/Burkholderiales                   |
| 1673  | Alphaproteobacteria;Sphingomonadales/Novo-A2          | 4585  | Alphaproteobacteria;Acetobacteraceae/alfVIII      |
| 1992  | Betaproteobacteria;Acidovorax/Lhab-A1                 | 4810  | Betaproteobacteria;Rhodocyclaceae/Burkholderiales |
| 2079  | Alphaproteobacteria;Roseomonas/alfVIII                | 4998  | Betaproteobacteria;Comamonadaceae/betI-A          |
| 2123  | Proteobacteria;/alfVI                                 | 5109  | Betaproteobacteria;Comamonadaceae/betI            |
| 2573  | Betaproteobacteria;Burkholderiales/betI-A             | 5250  | Alphaproteobacteria;/alfVI                        |
| 2760  | Bacteroidetes;Chitinophagaceae/bacI-A3                | 5289  | Alphaproteobacteria;Rhodobacter/alfVI             |
| 2886  | Betaproteobacteria;Burkholderiales/Betaproteobacteria | 5301  | Alphaproteobacteria;Erythrobacteraceae/Novo-A1    |
| 3013  | Betaproteobacteria;Burkholderiales/Lhab-A4            | 5331  | Alphaproteobacteria;Roseomonas/alfVIII            |
| 3105  | Gammaproteobacteria;Rheinheimera/Proteobacteria       | 5359  | Alphaproteobacteria;Acetobacteraceae/alfVIII      |
| 355   | Gemmatimonadetes;Gemmatimonas/Proteobacteria          | 5395  | Alphaproteobacteria;Porphyrobacter/alfIV-A        |
| 3923  | Gammaproteobacteria;Rheinheimera/Gammaproteobacteria  | 639   | Gemmatimonadetes;Gemmatimonas/Gammaproteobacteria |
| 4149  | Alphaproteobacteria;Erythromicrobium/Novo-A1          | 717   | Gemmatimonadetes;Gemmatimonas/Gammaproteobacteria |
| 423   | Gammaproteobacteria;Silanimonas/Proteobacteria        | 864   | Betaproteobacteria;Hydrogenophaga/betI-A          |
| 4393  | Alphaproteobacteria;Rhodobacteraceae/alfVI            | 925   | Alphaproteobacteria;Acetobacteraceae/alfVIII      |

*Cylindrospermopsis raciborskii*

| # OTU | RDP/FW                                           | # OTU | RDP/FW                                                    |
|-------|--------------------------------------------------|-------|-----------------------------------------------------------|
| 1182  | Bacteroidetes;Algoriphagus/Algor                 | 3368  | Betaproteobacteria;Burkholderiales/Lhab-A4                |
| 1272  | Betaproteobacteria;Oxalobacteraceae/betVII-B1    | 3484  | Alphaproteobacteria;Rhodobacteraceae/M-L-85               |
| 1412  | Actinobacteria;Propionibacterium/Actinomycetales | 3524  | Alphaproteobacteria;Rhodobacteraceae/alfVI                |
| 1442  | Actinobacteria;Actinomycetales/acSTL-A2          | 3632  | Bacteroidetes;Cytophagaceae/bacIII-A                      |
| 1525  | unclassified;/Gammaproteobacteria                | 367   | Deltaproteobacteria;Peredibacter/Proteobacteria           |
| 1936  | Bacteroidetes;Sphingobacteriales/Algor           | 3993  | Gammaproteobacteria;Alteromonadales/gamII-A2              |
| 2059  | Gammaproteobacteria;Pseudomonas/Pseudo-A1        | 4642  | Alphaproteobacteria;Rhizobiales/alfI-B1                   |
| 2168  | Alphaproteobacteria;Bosea/alfI-A1                | 4758  | Actinobacteria;Actinomycetales/Luna1-A1                   |
| 2190  | Betaproteobacteria;Aquabacterium/Burkholderiales | 4949  | Actinobacteria;/Actinobacteria                            |
| 2447  | Alphaproteobacteria;Rhizobiales/alfVII           | 4965  | Bacteroidetes;Sphingobacteriales/Sphingobacteriales       |
| 2520  | Actinobacteria;Rubrobacter/                      | 5208  | Alphaproteobacteria;Rhodospirillaceae/Alphaproteobacteria |
| 2558  | Alphaproteobacteria;Rhodobacteraceae/alfVI       | 687   | Bacteroidetes;Flavisolibacter/bacI-A                      |
| 3165  | Bacteroidetes;Cytophagaceae/bacIII-A             |       |                                                           |

Specific OTUs associated with each studied phytoplankton species. Taxonomic affiliation of two classification databases is shown after identification number: RDP (Ribosomal database Project) and FW (Freshwater database).
