# Supplementary material for: Host-Specificity and Dynamics in Bacterial Communities Associated with Bloom-Forming Freshwater Phytoplankton
Source: PubMed Central journal article supplement (PMC3896425; doi:10.1371/journal.pone.0085950), 2014-01-20
Supplement: pone.0085950.s008.pdf [file pone.0085950.s008.pdf]

Table S6 – Two Sample t-test of *Alphaproteobacteria* and *Betaproteobacteria* proportions between sampling days.

|             |                       | Alphaproteobacteria |            |        | Betaproteobacteria |              |                  |
|-------------|-----------------------|---------------------|------------|--------|--------------------|--------------|------------------|
|             |                       | 1-2                 | 2-3        | 1-3    | 1-2                | 2-3          | 1-3              |
| Attached    | <i>A. granulata</i>   | 0.017               | <b>Ns.</b> | Ns.    | <b>0.035</b>       | <b>Ns.</b>   | <b>0.018</b>     |
|             | <i>M. aeruginosa</i>  | Ns.                 | <b>Ns.</b> | <0.001 | <b>0.037</b>       | <b>Ns.</b>   | <b>0.012</b>     |
|             | <i>C. raciborskii</i> | 0.013               | Ns.        | 0.016  | <b>0.006</b>       | Ns.          | <b>0.014</b>     |
| Free-living | <i>A. granulata</i>   | <b>Ns.</b>          | Ns.        | Ns.    | <b>Ns.</b>         | <b>0.049</b> | <b>0.038</b>     |
|             | <i>M. aeruginosa</i>  | 0.014               | Ns.        | 0.022  | <b>0.025</b>       | <b>Ns.</b>   | <b>0.009</b>     |
|             | <i>C. raciborskii</i> | Ns.                 | Ns.        | Ns.    | <b>&lt;0.001</b>   | <b>Ns.</b>   | <b>&lt;0.001</b> |

*P-values* from Welch Two Sample t-test of *Alphaproteobacteria* and *Betaproteobacteria* proportions between sampling days. Bold values indicate samples where the mean proportion decreased with time. 1 = lag or beginning of exponential growth phase, 2 = exponential growth phase, 3 = stationary growth phase. \* To *Cylindrospermopsis raciborskii* 2 and 3 were stationary and senescent phases, respectively
