# Supplementary material for: Host-Specificity and Dynamics in Bacterial Communities Associated with Bloom-Forming Freshwater Phytoplankton
Source: PubMed Central journal article supplement (PMC3896425; doi:10.1371/journal.pone.0085950), 2014-01-20
Supplement: pone.0085950.s009.pdf [file pone.0085950.s009.pdf]

Table S7 - Relative abundances of Classes in each treatment.

| Taxon                                            | Bac_In | A_d02_ab   | A_d02_fb  | A_d09_ab   | A_d09_fb  | A_d16_ab   | A_d16_fb   | C_d02_ab   | C_d02_fb  | C_d15_ab   | C_d15_fb   | C_d17_ab    | C_d17_fb   | C_Ct        | M_d02_ab    | M_d02_fb    | M_d15_ab   | M_d15_fb   | M_d20_ab    | M_d20_fb   |
|--------------------------------------------------|--------|------------|-----------|------------|-----------|------------|------------|------------|-----------|------------|------------|-------------|------------|-------------|-------------|-------------|------------|------------|-------------|------------|
| Bacteria,Acidobacteria,Acidobacteria_Gp3         | -      | -          | -         | -          | 0.06±0.05 | 0.09±0.04  | 0.13±0.17  | -          | -         | -          | -          | 0.03±0.05   | 0.03±0.01  | -           | -           | -           | -          | -          | -           | -          |
| Bacteria,Acidobacteria,Acidobacteria_Gp4         | 0.11   | -          | -         | -          | -         | -          | -          | -          | -         | -          | -          | -           | -          | -           | -           | -           | -          | -          | -           | -          |
| Bacteria,Acidobacteria,Acidobacteria_Gp6         | -      | -          | -         | -          | 0±0.01    | -          | 0.01±0.02  | -          | -         | -          | -          | -           | -          | -           | -           | -           | -          | 0±0.01     | -           | -          |
| Bacteria,Acidobacteria,Holophagae                | 0.01   | -          | -         | -          | -         | -          | -          | -          | -         | -          | -          | -           | -          | -           | -           | -           | -          | -          | -           | -          |
| Bacteria,Actinobacteria,Actinobacteria           | 72.4   | 0.43±0.28  | 0.48±0.14 | 0.04±0.04  | 1.11±0.16 | 3.58±2.83  | 6.02±2.31  | 5.87±3.01  | 4.25±2.21 | 0.03±0.05  | 3.83±2.27  | 0.16±0.15   | 6.47±2.28  | 0.92±1.18   | 0.25±0.43   | 0.4±0.19    | 0.7±0.72   | 0.72±0.27  | 1.13±1.16   | 1.79±2.71  |
| Bacteria,Bacteria_incertae_sedis,Ktedonobacteria | 0.02   | -          | -         | -          | -         | -          | 0.01±0.02  | -          | -         | -          | -          | 0.05±0.05   | 0.01±0.01  | -           | -           | -           | -          | -          | -           | -          |
| Bacteria,Bacteroidetes,Bacteroidia               | -      | -          | -         | -          | -         | -          | -          | 1.29±1.82  | -         | -          | -          | -           | -          | 0.28±0.42   | -           | -           | -          | -          | 0.78±1.34   | -          |
| Bacteria,Bacteroidetes,Flavobacteria             | 0.33   | -          | 0.02±0.01 | 1.03±0.8   | 0.13±0.05 | 1±0.51     | 0.05±0.04  | 0.71±1.01  | 0.01±0.02 | 10.57±8.98 | 4.17 ±3    | 2.91±3.82   | 1.05±0.8   | 0.22±0.28   | 0.46±0.57   | 0.22±0.2    | 4.6±3.06   | 0.03±0.01  | 6.92±6.24   | 0.06±0.06  |
| Bacteria,Bacteroidetes,Sphingobacteria           | 0.68   | -          | 1.24±0.13 | 1.34±0.49  | 9.57±1.21 | 3.8±1.86   | 21.74±13.1 | 0.14±0.2   | 0.83±0.33 | 9.09±11.27 | 24.96±7.94 | 2.12±1.81   | 25.37±4.18 | 0.18±0.31   | -           | 0.96±0.1    | 4.89±3.56  | 30.7±9.86  | 1.6±2.31    | 16.07±7.33 |
| Bacteria,Bacteroidetes,Other                     | 0.05   | -          | 0.09±0.03 | 2.42±1.53  | 0.43±0.1  | 0.62±0.39  | 0.38±0.09  | -          | 0.09±0.04 | 0.22±0.29  | 0.56±0.67  | 1.1±0.1     | 2.34±2.91  | -           | 0.75±0.21   | 0.48±0.83   | 2.33±3.98  | -          | 22.56±19.58 | -          |
| Bacteria,Chlamydiae,Chlamydiae                   | 0.38   | -          | 0.01±0.01 | -          | -         | -          | -          | -          | 0.02±0.02 | -          | -          | -           | -          | -           | 0.01±0.01   | -           | -          | -          | -           | -          |
| Bacteria,Firmicutes,Bacilli                      | 0.07   | -          | -         | 0.01±0.01  | -         | -          | -          | -          | 0.01±0.01 | -          | -          | -           | 3.43±5.44  | -           | -           | -           | -          | -          | 0.19±0.32   | -          |
| Bacteria,Firmicutes,Clostridia                   | -      | 0.13±0.23  | -         | -          | -         | -          | -          | 1.9±1.36   | 0.07±0.07 | -          | -          | -           | 0.41±0.26  | -           | -           | 1.11±1.79   | -          | -          | -           | -          |
| Bacteria,Gemmatimonadetes,Gemmatimonadetes       | 0.49   | -          | 0.02±0.02 | 0.04±0.02  | 0.55±0.2  | 0.3±0.47   | 0.16±0.11  | -          | 0.26±0.23 | 3.01±1.69  | 5.42±1.39  | 8.66±4.91   | 6.03±5.74  | -           | -           | 0.02±0.01   | 8.59±1.5   | 6.82±2.93  | 26.34±6.36  | 3.37±1.85  |
| Bacteria,OD1,OD1_genera_incertae_sedis           | 0.15   | -          | -         | -          | -         | -          | -          | -          | 0.02±0.01 | -          | -          | -           | -          | -           | -           | -           | -          | -          | -           | -          |
| Bacteria,OP10,OP10_genera_incertae_sedis         | -      | -          | -         | 0.08±0.14  | -         | 1.9±3.23   | 0.01±0.02  | -          | -         | -          | 0.03±0.04  | -           | 0.01±0.01  | 0.04±0.06   | -           | -           | -          | -          | -           | -          |
| Bacteria,Planctomycetes,Planctomycetacia         | 1.53   | -          | -         | -          | -         | 1.01±1.72  | 0.01±0.02  | -          | 0.02±0.02 | -          | 0.01±0.02  | -           | -          | -           | 0.01±0.01   | -           | 0±0.01     | -          | -           | -          |
| Bacteria,Proteobacteria,Alphaproteobacteria      | 11.38  | 10.18±2.27 | 14.74±2.8 | 31.65±6.17 | 11.53±1.9 | 27.18±10.4 | 38.22±19.0 | 3.65±2.52  | 7.74±4.75 | 47.16±10.4 | 28.12±9.84 | 40.08±9.68  | 31.58±13.3 | 2.01±2.38   | 7.13±1.41   | 13.24±5.39  | 23.25±7.15 | 31.84±5.43 | 20.76±1.68  | 32.97±7.21 |
| Bacteria,Proteobacteria,Betaproteobacteria       | 6.31   | 82.71±3.73 | 80.43±2.4 | 57.68±9.8  | 71.89±4.5 | 50.56±9.69 | 25.58±19.6 | 81.32±7.92 | 85.39±6.2 | 17.02±12.4 | 26.56±6.37 | 31.64±13.56 | 23.53±6.7  | 89.44±11.91 | 67.88±14.41 | 58.9±9.74   | 26.66±1.7  | 25.29±1.48 | 13.73±6.47  | 17.11±4.21 |
| Bacteria,Proteobacteria,Deltaproteobacteria      | 0.4    | -          | -         | 0.21±0.34  | 0.46±0.71 | 0.03±0.03  | -          | -          | 0.02±0.02 | 0.43±0.55  | 0.04±0.04  | 0.65±1.13   | 0.1±0.1    | 0.01±0.01   | -           | -           | 0.05±0.09  | 0.01±0.01  | -           | 0.01±0.01  |
| Bacteria,Proteobacteria,Gammaproteobacteria      | 0.9    | 6.19±2.74  | 2.8±0.18  | 3.84±5.27  | 1.09±1.37 | 7.16±6.12  | 1.18±1.07  | 4.99±2.2   | 0.7±0.88  | 7.27±3.3   | 3.61±2.01  | 2.6±1.22    | 1.33±1.67  | 2.27±1.79   | 23.78±14.59 | 25.16±14.28 | 12.8±4.73  | 1.71±0.35  | 18.65±3.27  | 5.16±1.31  |
| Bacteria,Proteobacteria,Other                    | 0.26   | 0.16±0.18  | 0.13±0.05 | 0.95±0.78  | 0.06±0.02 | 2.2±0.25   | 0.12±0.12  | -          | 0.31±0.44 | 3.73±1.73  | 0.46±0.21  | 9.31±3.26   | 0.27±0.15  | 0.75±0.64   | 0.49±0.85   | 0.31±0.06   | 16.81±8.72 | 0.37±0.19  | 9.92±9.59   | 0.76±0.1   |
| Bacteria,Spirochaetes,Spirochaetes               | 0.01   | -          | -         | -          | -         | 0.01±0.02  | 0.01±0.02  | -          | -         | -          | -          | -           | -          | -           | -           | -           | -          | -          | -           | 0.01±0.01  |
| Bacteria,TM7,TM7_genera_incertae_sedis           | 0.09   | -          | -         | -          | 0±0.01    | 0.02±0.03  | -          | -          | 0±0.01    | -          | -          | -           | -          | -           | -           | -           | -          | -          | 0±0.01      | -          |
| Bacteria,Verrucomicrobia,Opiritatae              | 0.41   | -          | -         | 0.27±0.13  | 0.51±0.27 | 0.07±0.01  | 0.78±0.26  | 0.14±0.2   | 0.04±0.03 | 0.47±0.82  | 0.32±0.45  | -           | 0.87±0.91  | -           | -           | -           | -          | 0.01±0.01  | -           | -          |
| Bacteria,Verrucomicrobia,Spartobacteria          | 0.34   | -          | -         | 0.01±0.01  | 1.72±0.44 | 0.03±0.04  | 3.41±2.06  | -          | 0.02±0.03 | -          | -          | -           | -          | -           | -           | -           | -          | -          | -           | 0.01±0.01  |
| Bacteria,Verrucomicrobia,Subdivision3            | -      | -          | -         | 0.2±0.11   | 0.05±0.03 | 0.32±0.23  | 1.73±1.06  | -          | -         | -          | -          | -           | 0.01±0.02  | -           | -           | -           | -          | -          | -           | -          |
| Bacteria,Verrucomicrobia,Verrucomicrobiae        | 0.21   | -          | -         | 0.11±0.09  | 0.25±0.12 | -          | 0.02±0.02  | -          | 0.02±0.03 | -          | 1.87±1.84  | 0.32±0.25   | 0.88±0.89  | -           | -           | -           | -          | 0.01±0.01  | -           | 0.04±0.06  |
| Bacteria,Verrucomicrobia,Other                   | 0.01   | -          | -         | -          | 0.01±0.01 | -          | 0.04±0.08  | -          | 0±0.01    | -          | -          | -           | -          | -           | -           | -           | -          | -          | -           | -          |
| Bacteria,Other,Other                             | 3.43   | 0.2±0.18   | 0.04±0.01 | 0.13±0.15  | 0.57±0.17 | 0.1±0.05   | 0.39±0.39  | -          | 0.17±0.17 | 1.01±1.01  | 0.04±0.04  | 0.38±0.19   | 0.13±0.04  | 0.04±0.07   | -           | 0.03±0.03   | 0.05±0.09  | 0.14±0.03  | -           | 0.09±0.07  |

Relative abundances (% of reads per sample) of Classes in the replicates of each treatment. Naïve bayesian classification was used. Bac\_In, bacterial inoculum. Names of samples are comprised by the first letter of the alga name (A, *Aulacoseira granulata*; C, *Cylindrospermopsis raciborskii*; M, *Microcystis aeruginosa*), day of sampling (dxx), fraction (ab, adhered bacteria; fb, free-living bacteria). Mean ±SD, n = 3. – denotes not detected.
